# Supplementary material for: Hydroxyl-functionalized pillar[5]arene with high separation performance for gas chromatography
Source: Royal Society of Chemistry journal article supplement (doi:10.1039/d3an01975f), 2024-01-01
Supplement: d3an01975f1.pdf [file d3an01975f1.pdf]

## Electronic Supplementary Information

### Hydroxyl-functionalized pillar[5]arene with high separation performance for gas chromatography

Mengyi Ba <sup>a</sup>, Wen Li <sup>a</sup>, Yanli Song <sup>a</sup>, Yuanyuan Zhang <sup>a</sup>, Xiang Xu <sup>a</sup>, Haixin Liu <sup>a</sup>,  
Zhiqiang Cai <sup>a,\*</sup>, Shaoqiang Hu <sup>b</sup>, Xianming Liu <sup>b</sup>, Tao Sun <sup>b,\*</sup>

*a. Liaoning Province Professional and Technical Innovation Center for Fine Chemical Engineering of Aromatics Downstream, School of Petrochemical Engineering, Shenyang University of Technology, Liaoyang 111003, P. R. China*

*b. College of Chemistry and Chemical Engineering, Henan Key Laboratory of Function-Oriented Porous Materials, Luoyang Normal University, Luoyang 471934, P. R. China*

#### **List of Contents:**

\* E-mail addresses: kahongzqc@163.com (Z. Cai); suntao2226@163.com (T. Sun).

- 1.  $^1\text{H}$  NMR spectrum, Infrared spectrum and ESI-MS spectrum of the compounds**
- 2. The parameters of the Golay equations for the capillary columns**
- 3. Resolution for the isomers on the columns**
- 4. Structures and properties of the analytes**
- 5. Chromatograms of commercial reagent samples**
- 6. Repeatability, reproducibility and long-term stability of the P5A-C10-OH capillary column**

# 1. <sup>1</sup>H NMR spectrum, Infrared spectrum and ESI-MS spectrum of the compounds

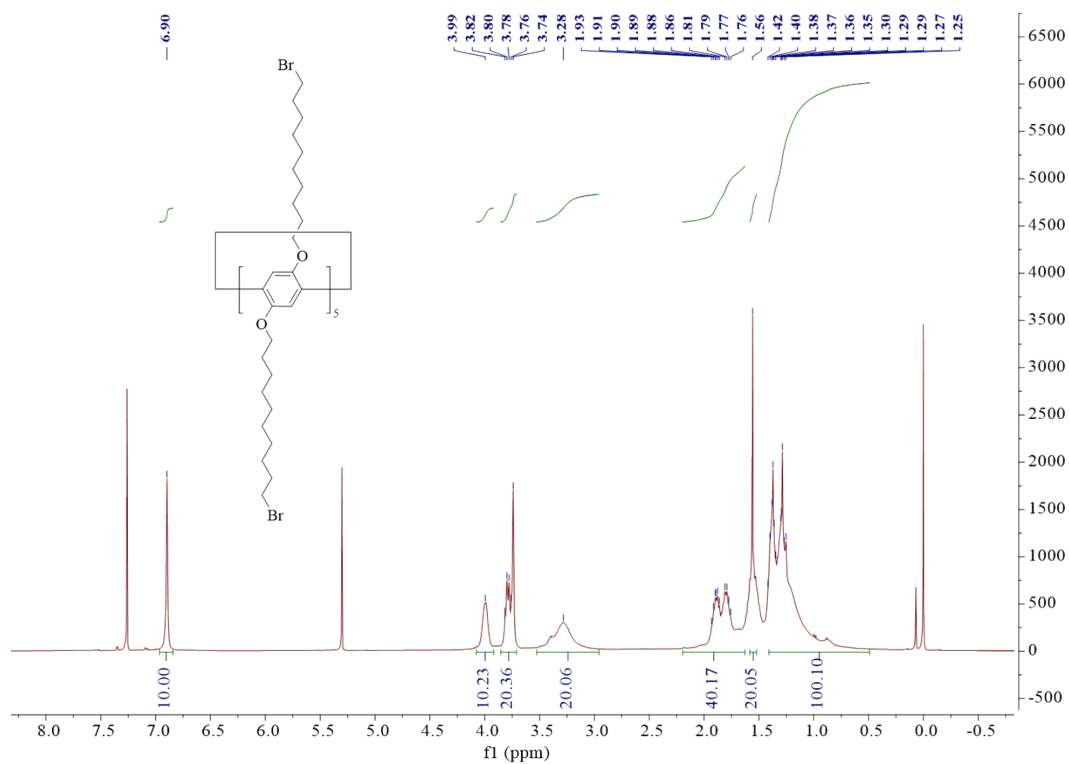

Fig. S1 <sup>1</sup>H NMR spectrum of P5A-C10-FBr.

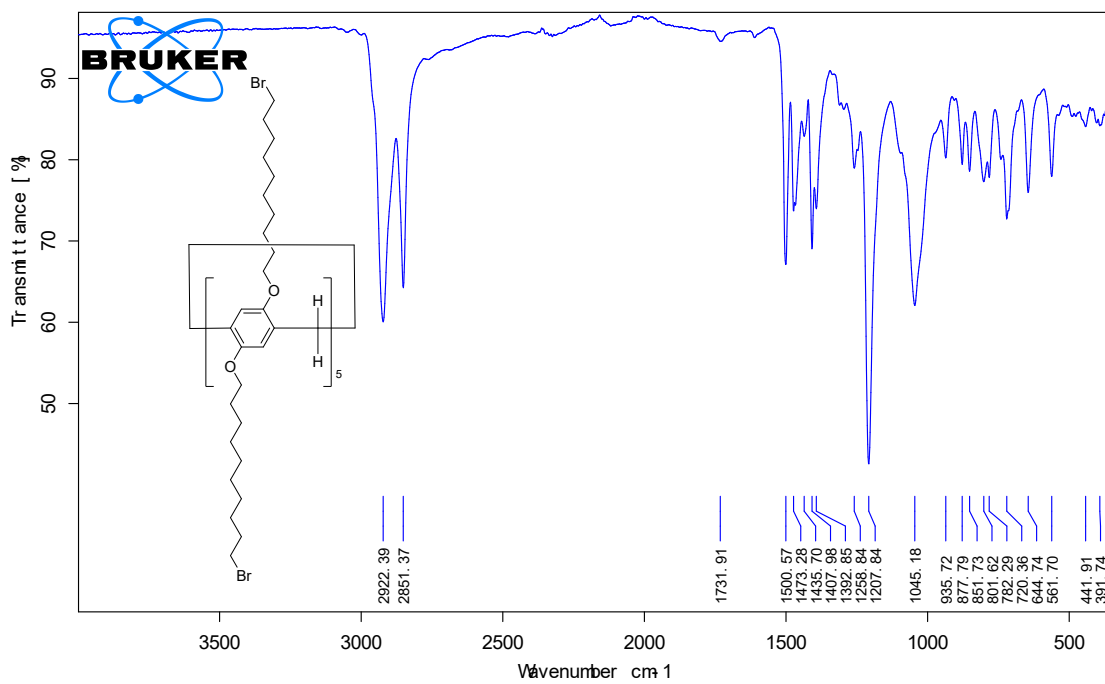

Fig. S2 Infrared spectrum of P5A-C10-FBr.

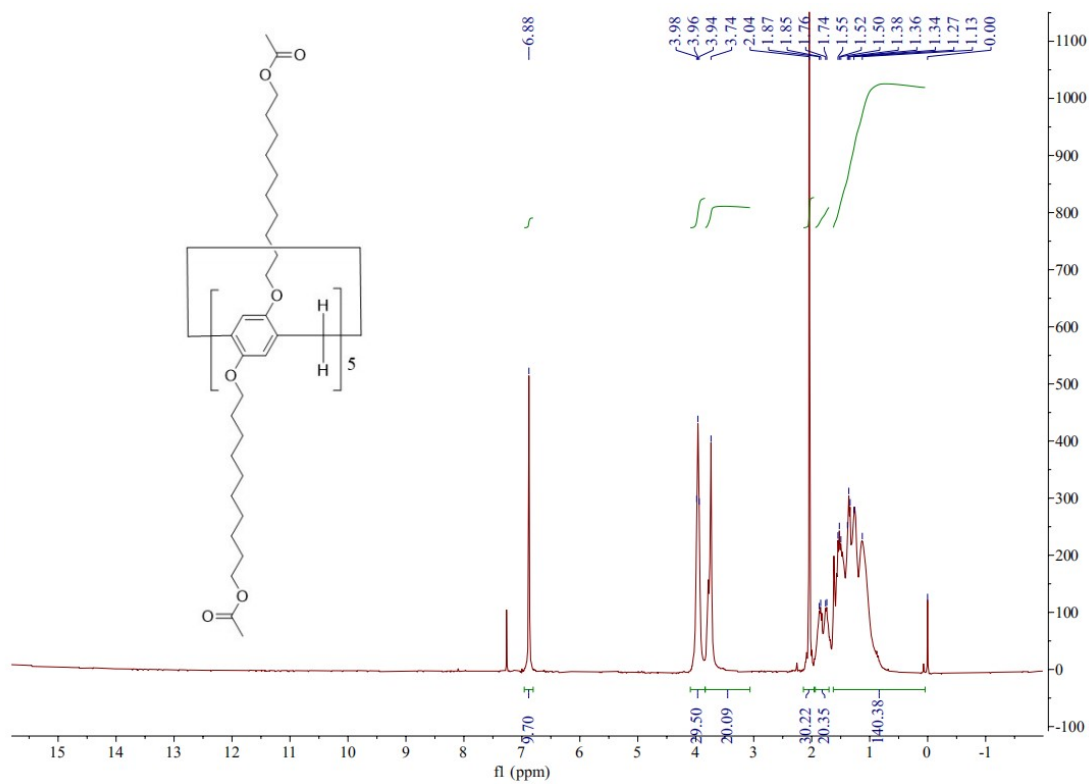

Fig. S3  $^1\text{H}$  NMR spectrum of P5A-C10-OAc.

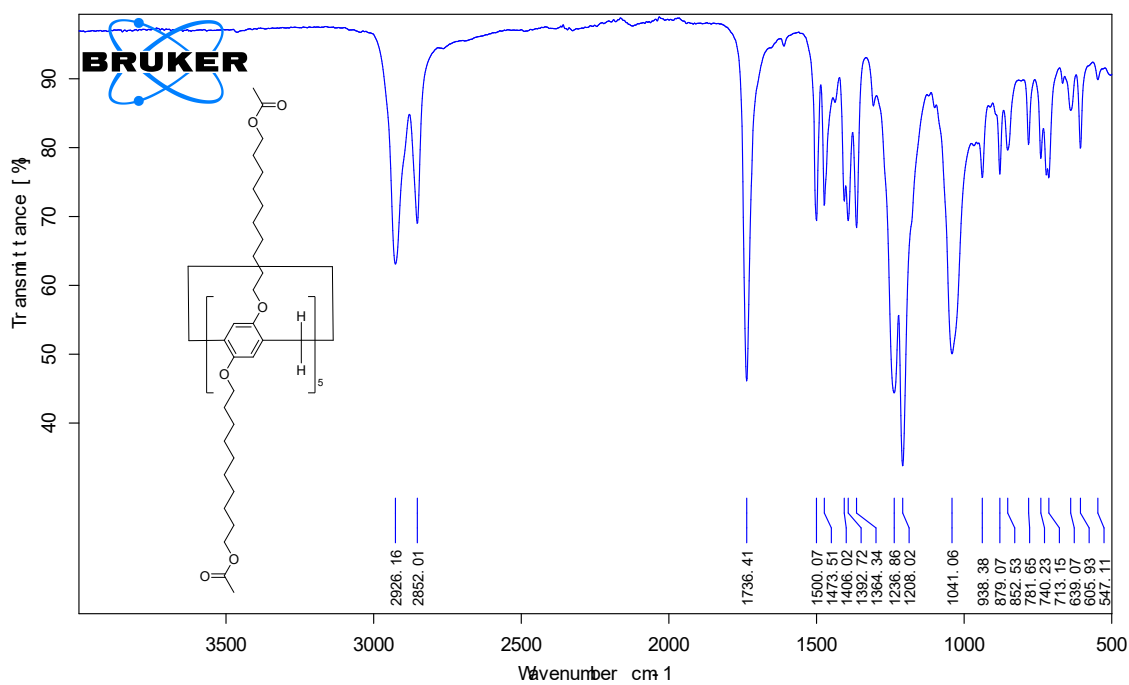

Fig. S4 Infrared spectrum of P5A-C10-OAc.

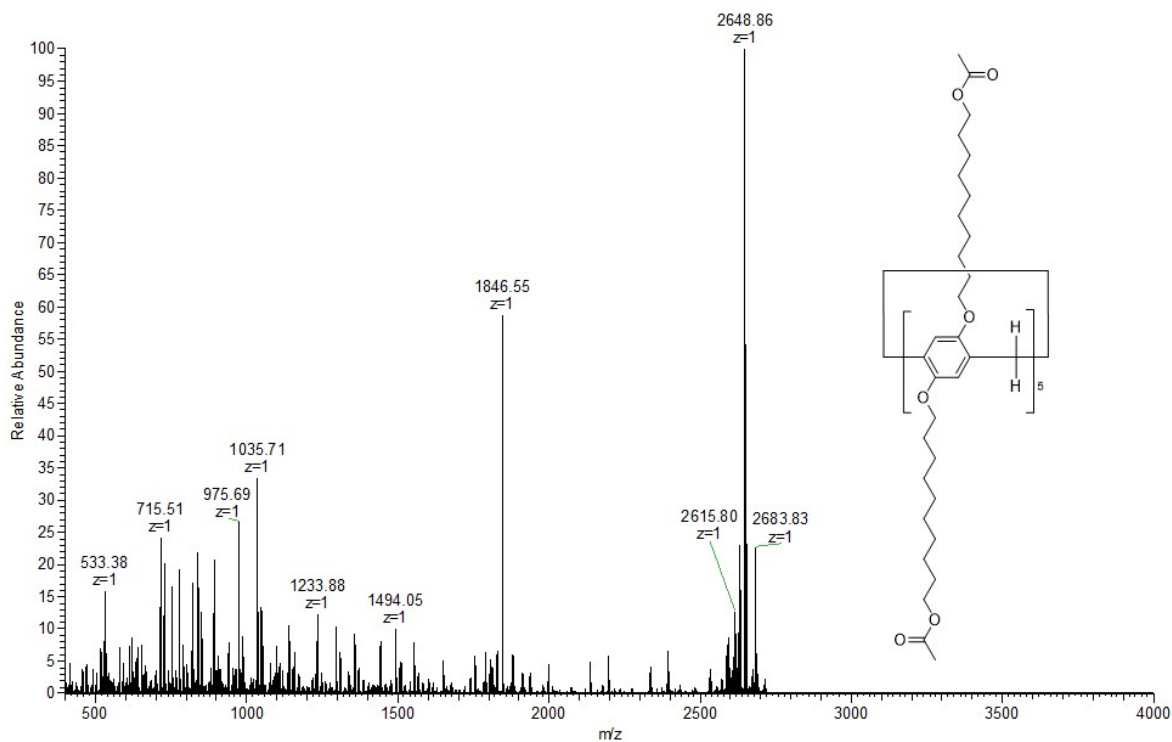

Fig. S5 ESI-MS spectrum of P5A-C10-OAc.

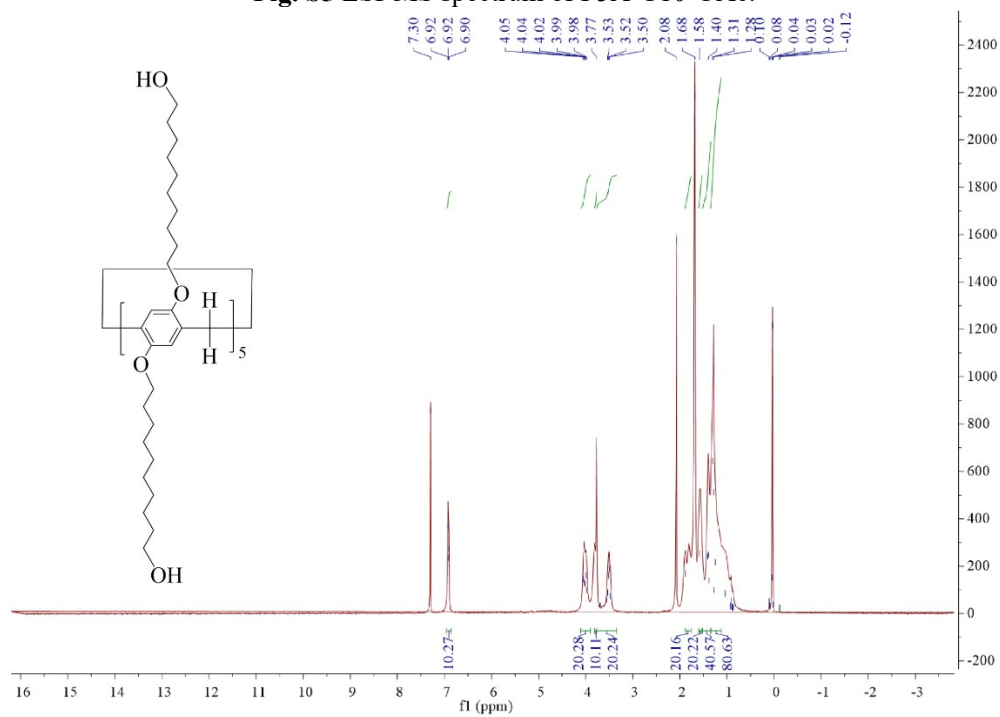

Fig. S6  $^1\text{H}$  NMR spectrum of P5A-C10-OH.

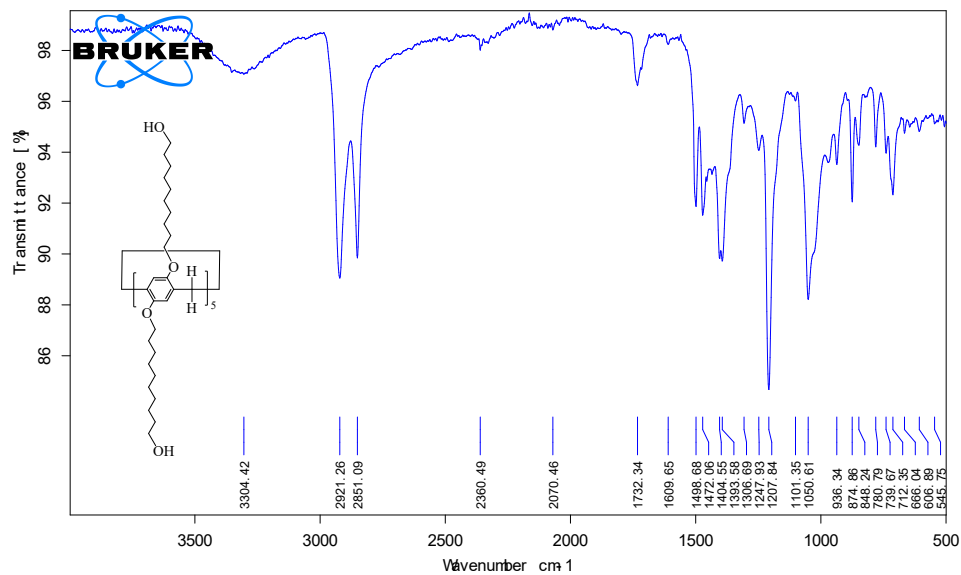

Fig. S7 Infrared spectrum of P5A-C10-OH.

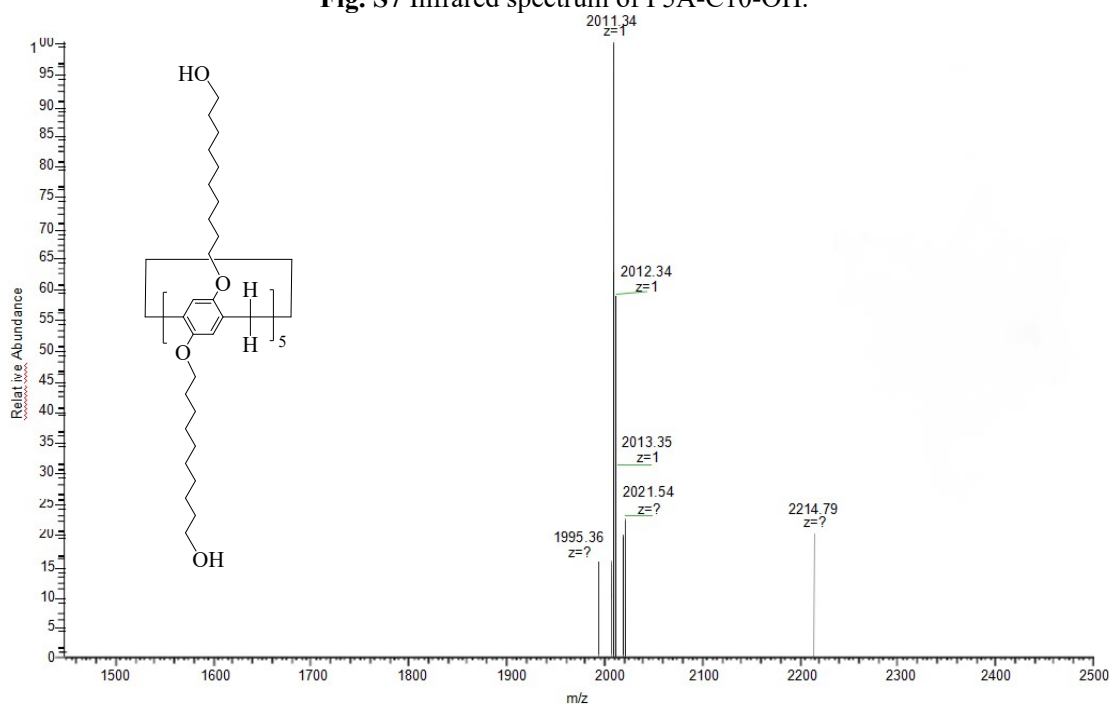

Fig. S8 ESI-MS spectrum of P5A-C10-OH.

## 2. The parameters of the Golay equations for the capillary columns

**Table S1.** The minimum plate height ( $H_{\min}$ ), column efficiency ( $n$ ), retention factor ( $k$ ) and the coefficients ( $B$ ,  $C$ ) of the Golay equations for the P5A-C10-OH and P5A-C10 capillary columns determined by *n*-dodecane at 120 °C.

| Parameters                         | P5A-C10-OH           | P5A-C10              |
|------------------------------------|----------------------|----------------------|
| $H_{\min}$ (mm)                    | 0.31                 | 0.46                 |
| $n$ (plates/m)                     | 3233                 | 2172                 |
| $u_{\text{opt}}$ (cm/s)            | 15.08                | 8.76                 |
| $k$ (at $u_{\text{opt}}$ )         | 2.35                 | 4.96                 |
| $B$ ( $\pm$ SD) (mm $\times$ cm/s) | 5.31 ( $\pm$ 1.86)   | 8.05 ( $\pm$ 1.46)   |
| $C$ ( $\pm$ SD) (mm $\times$ s/cm) | 0.034 ( $\pm$ 0.005) | 0.068 ( $\pm$ 0.005) |

### 3. Resolution for the isomers on the columns

**Table S2.** Resolution (*R*) for the isomers on P5A-C10-OH, P5A-C10 and HP-35 columns.

| Analytes           | P5A-C10-OH    |          | P5A-C10       |           | HP-35         |           |
|--------------------|---------------|----------|---------------|-----------|---------------|-----------|
|                    | Elution order | <i>R</i> | Elution order | <i>R</i>  | Elution order | <i>R</i>  |
| dichlorobenzene    | <i>m</i> -    | -        | <i>m</i> -    | -         | <i>m</i> -    | -         |
|                    | <i>o</i> -    | 3.33     | <i>p</i> -    | co-eluted | <i>p</i> -    | 3.47      |
|                    | <i>p</i> -    | 2.31     | <i>o</i> -    | 1.05      | <i>o</i> -    | 5.62      |
| dibromobenzene     | <i>m</i> -    | -        | <i>m</i> -    | -         | <i>m</i> -    | -         |
|                    | <i>o</i> -    | 4.27     | <i>p</i> -    | co-eluted | <i>p</i> -    | 1.80      |
|                    | <i>p</i> -    | 5.16     | <i>o</i> -    | 1.30      | <i>o</i> -    | 5.57      |
|                    | <i>m</i> -    | -        | <i>m</i> -    | -         | <i>m</i> -    | -         |
| chloronitrobenzene | <i>o</i> -    | 4.32     | <i>o</i> -    | 0.56      | <i>p</i> -    | 4.04      |
|                    | <i>p</i> -    | 21.54    | <i>p</i> -    | 2.03      | <i>o</i> -    | 1.93      |
|                    | <i>m</i> -    | -        | <i>m</i> -    | -         | <i>m</i> -    | -         |
| bromonitrobenzene  | <i>o</i> -    | 3.36     | <i>o</i> -    | co-eluted | <i>p</i> -    | 3.31      |
|                    | <i>p</i> -    | 27.94    | <i>p</i> -    | 12.23     | <i>o</i> -    | 1.05      |
|                    | 2,6-          | -        | 2,6-          | -         | 2,6-          | -         |
| xylenol            | 2,5-          | 17.43    | 2,5-          | 3.80      | 2,5-          | 8.71      |
|                    | 2,3-          | 5.63     | 2,3-          | 2.30      | 3,5-          | 5.29      |
|                    | 3,5-          | 2.92     | 3,5-          | 0.45      | 2,3-          | 2.78      |
|                    | 3,4-          | 4.24     | 3,4-          | 0.99      | 3,4-          | 4.05      |
|                    | <i>o</i> -    | -        | <i>o</i> -    | -         | <i>o</i> -    | -         |
| chloroaniline      | <i>p</i> -    | 18.83    | <i>m</i> -    | 5.44      | <i>m</i> -    | 18.50     |
|                    | <i>m</i> -    | 2.05     | <i>p</i> -    | co-eluted | <i>p</i> -    | 0.47      |
|                    | <i>o</i> -    | -        | <i>o</i> -    | -         | <i>o</i> -    | -         |
| bromoaniline       | <i>m</i> -    | 19.62    | <i>m</i> -    | 6.67      | <i>m</i> -    | 14.55     |
|                    | <i>p</i> -    | 2.21     | <i>p</i> -    | 0.48      | <i>p</i> -    | co-eluted |
|                    | <i>o</i> -    | -        | <i>o</i> -    | -         | <i>o</i> -    | -         |
| iodoaniline        | <i>m</i> -    | 17.49    | <i>m</i> -    | 8.72      | <i>m</i> -    | 16.86     |
|                    | <i>p</i> -    | 2.32     | <i>p</i> -    | 1.76      | <i>p</i> -    | 0.65      |
|                    | <i>o</i> -    | -        | <i>o</i> -    | -         | <i>o</i> -    | -         |
| phenylenediamine   | <i>p</i> -    | 9.33     | <i>p</i> -    | 2.88      | <i>p</i> -    | 11.78     |
|                    | <i>m</i> -    | 4.06     | <i>m</i> -    | 0.89      | <i>m</i> -    | 7.28      |
|                    | 2,6-          | -        | 2,6-          | -         | 2,6-          | -         |
| dimethylaniline    | 2,5-          | 3.07     | 2,5-          | 0.37      | 2,5-          | 0.63      |
|                    | 2,3-          | 4.16     | 2,3-          | 1.73      | 3,4-          | 5.98      |
|                    | 3,4-          | 1.84     | 3,4-          | co-eluted | 2,3-          | 1.49      |

### 4. Structures and properties of the analytes

**Table S3.** Structures and properties of the analytes.

| Compound                  | Structure                                                                           | Boiling point | Dipole moment |
|---------------------------|-------------------------------------------------------------------------------------|---------------|---------------|
| <i>o</i> -dichlorobenzene |  | 180.4 °C      | 3.50Debye     |
| <i>m</i> -dichlorobenzene |  | 173 °C        | 2.27Debye     |
| <i>p</i> -dichlorobenzene |  | 174.1 °C      | 0Debye        |
| <i>o</i> -dibromobenzene  |  | 224 °C        | 2.14Debye     |

|                          |                                                                                     |          |           |
|--------------------------|-------------------------------------------------------------------------------------|----------|-----------|
| <i>m</i> -dibromobenzene |     | 219.5 °C | 1.43Debye |
| <i>p</i> -dibromobenzene |    | 219 °C   | 0Debye    |
| 2,3-xylenol              |    | 218 °C   | 2.17Debye |
| 2,5-xylenol              |    | 212 °C   | 1.58Debye |
| 2,6-xylenol              |    | 203 °C   | 1.74Debye |
| 3,4-xylenol              |    | 225 °C   | 1.78Debye |
| 3,5-xylenol              |    | 219 °C   | 1.51Debye |
| 2,6-dimethylaniline      |    | 216 °C   | 2.35Debye |
| 2,5-dimethylaniline      |    | 218 °C   | 2.06Debye |
| 2,3-dimethylaniline      |   | 212 °C   | 2.14Debye |
| 3,4-dimethylaniline      |  | 226 °C   | 1.79Debye |

## 5. Chromatograms of commercial reagent samples

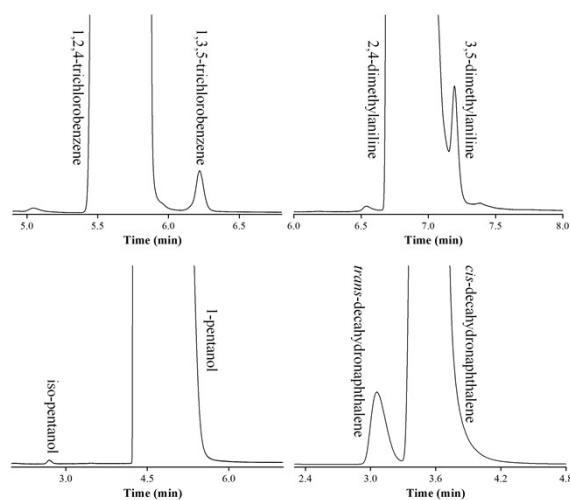

**Fig. S9** Applications of the P5A-C10-OH column for the determination of minor impurities in the real samples of 1,2,4-trichlorobenzene, 2,4-dimethylaniline, 1-pentanol and *cis*-decahydronaphthalene, respectively.



## 6. Repeatability, reproducibility, and long-term stability of the P5A-C10-OH

### capillary column

**Table S4.** Repeatability and reproducibility of the P5A-C10-OH capillary column on the retention times ( $t_R$ , min).

| Analytes              | run-to-run ( $n = 5$ ) |         | day-to-day ( $n = 4$ ) |         | column-to-column ( $n = 3$ ) |         |
|-----------------------|------------------------|---------|------------------------|---------|------------------------------|---------|
|                       | $t_R$ (min)            | RSD (%) | $t_R$ (min)            | RSD (%) | $t_R$ (min)                  | RSD (%) |
| <i>n</i> -tetradecane | 8.58                   | 0.03    | 8.57                   | 0.11    | 8.89                         | 2.48    |
| <i>n</i> -pentadecane | 9.32                   | 0.01    | 9.31                   | 0.06    | 9.52                         | 1.23    |
| <i>n</i> -hexadecane  | 10.01                  | 0.02    | 10.01                  | 0.03    | 10.17                        | 0.88    |
| 1-nonanol             | 8.93                   | 0.01    | 8.93                   | 0.04    | 9.13                         | 2.09    |
| 1-decanol             | 9.68                   | 0.01    | 9.69                   | 0.08    | 9.73                         | 0.49    |
| 1-undecanol           | 10.41                  | 0.01    | 10.43                  | 0.19    | 10.36                        | 0.23    |
| 1-dodecanol           | 11.35                  | 0.03    | 11.38                  | 0.21    | 11.24                        | 0.53    |
| methyl decanoate      | 8.98                   | 0.02    | 8.98                   | 0.03    | 9.16                         | 1.71    |
| methyl undecanoate    | 9.66                   | 0.02    | 9.67                   | 0.06    | 9.71                         | 0.44    |
| methyl laurate        | 10.37                  | 0.01    | 10.38                  | 0.12    | 10.36                        | 0.21    |

**Table S5.** Long-term stability of the P5A-C10-OH column on the retention times of the indicated isomer analytes over the time period.

| Analyte                | Retention time (min) |         |         | RSD (%) |
|------------------------|----------------------|---------|---------|---------|
|                        | 0 month              | 1 month | 6 month |         |
| <i>n</i> -tetradecane  | 8.55                 | 8.64    | 8.56    | 0.55    |
| <i>n</i> -pentadecane  | 9.29                 | 9.38    | 9.31    | 0.56    |
| <i>n</i> -hexadecane   | 9.98                 | 10.07   | 10.01   | 0.48    |
| 2,6-xylenol            | 7.34                 | 7.47    | 7.46    | 1.00    |
| 2,5-xylenol            | 8.94                 | 9.08    | 9.06    | 0.82    |
| 2,3-xylenol            | 9.42                 | 9.57    | 9.54    | 0.81    |
| 3,5-xylenol            | 9.68                 | 9.83    | 9.81    | 0.83    |
| 3,4-xylenol            | 10.10                | 10.25   | 10.25   | 0.86    |
| <i>o</i> -bromoaniline | 7.68                 | 7.81    | 7.79    | 0.96    |
| <i>m</i> -bromoaniline | 9.65                 | 9.81    | 9.76    | 0.83    |
| <i>p</i> -bromoaniline | 9.85                 | 10.01   | 9.97    | 0.82    |

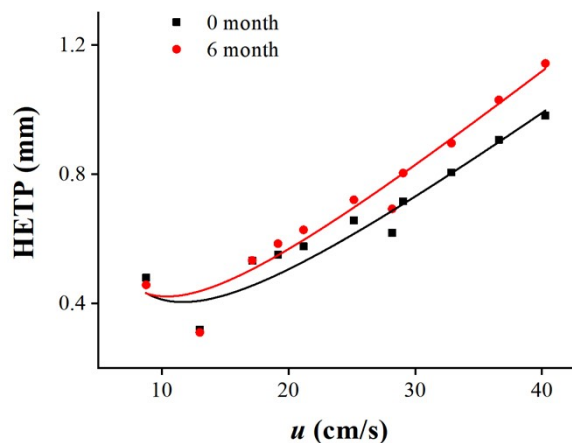

**Fig. S10** Long-term stability of the P5A-C10-OH column on the column efficiency over the time period.
